# Supplementary material for: A novel self-seeding polyol synthesis of Ag nanowires using mPEG-b-PVP diblock copolymer
Source: Royal Society of Chemistry journal article supplement (doi:10.1039/c4ra07703b), 2014-01-01
Supplement: c4ra07703b1.pdf [file c4ra07703b1.pdf]

# A Novel Self-Seeding Polyol Synthesis of Ag Nanowires Using mPEG-b-PVP Diblock Copolymer

Hesong Zhao,<sup>a, ||</sup> Jianwei Jiang,<sup>a, ||</sup> Young S. Lim,<sup>b</sup> Sangho Kim<sup>a,\*</sup> and Longhai Piao<sup>a,\*</sup>

## Supporting Information

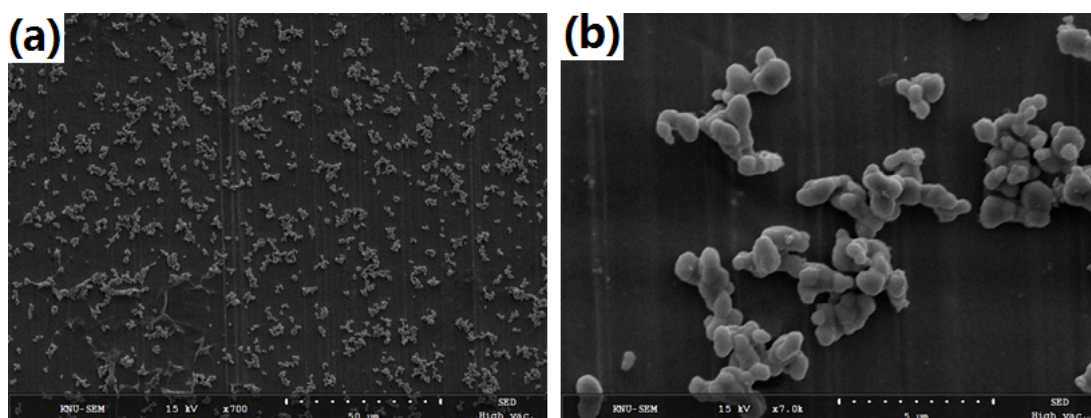

Fig S1: The SEM images of the Ag particles synthesized using the mixture of mPEG-5000 and PVP-29,000 homopolymer. (a) and (b) are the low and high-magnification SEM of the prepared PVP-Ag, respectively.
